# Supplementary material
Source: MDPI journal article supplement (https://www.mdpi.com/2311-5637/2/1/5)
Supplement: s1 [file s1]

# Supplementary Materials: Improving Process Yield in Succinic Acid Production by Cell Recycling of Recombinant *Corynebacterium glutamicum*

Toru Jojima, Ryoji Noburyu, Masako Suda, Shohei Okino, Hideaki Yukawa and Maysayuki Inui

## Supplementary Experimental Procedures

### Construction of *C. glutamicum* CRZ19 Strain

Cre/loxP-mediated gene transfer system [1] was employed to integrate two-copies of the *pyc* gene to the genome (Figure S1). Primers and plasmids used in this experiment was listed in Tables S1 and S2. First, the *loxP* site was inserted to the SSI (strain specific island) region of the genome by using the plasmid pCRB256 and subsequently the *pyc* gene was inserted via homologous recombination with pCRB255. The plasmids were introduced by electroporation [2]. Cells bearing two *loxP* sites into the genome were selected with corresponding antibiotics (kanamycin (Km), 50 µg/mL; spectinomycin (Sp), 200 µg/mL) and confirmed by PCR. Cre recombinase was expressed from pCRA406 to remove the region between the two *loxP* sites. Strains were selected by loss of antibiotic resistance (Km and Sp) and deletion of antibiotic makers and insertion of *pyc* were also confirmed by PCR. Next, to remove pCRA406 [3] the strains were cultivated in A-medium and strains losing chloramphenicol resistance were subsequently selected. The resulting strain was named as  $\Delta$ *ldhA-pyc*. Second copy of the *pyc* gene was integrated to the  $\Delta$ *ldhA-pyc* strain via homologs recombination with the plasmid pCRB241 to yield CRZ19. Insertion of two copies of *pyc* was confirmed by PCR.

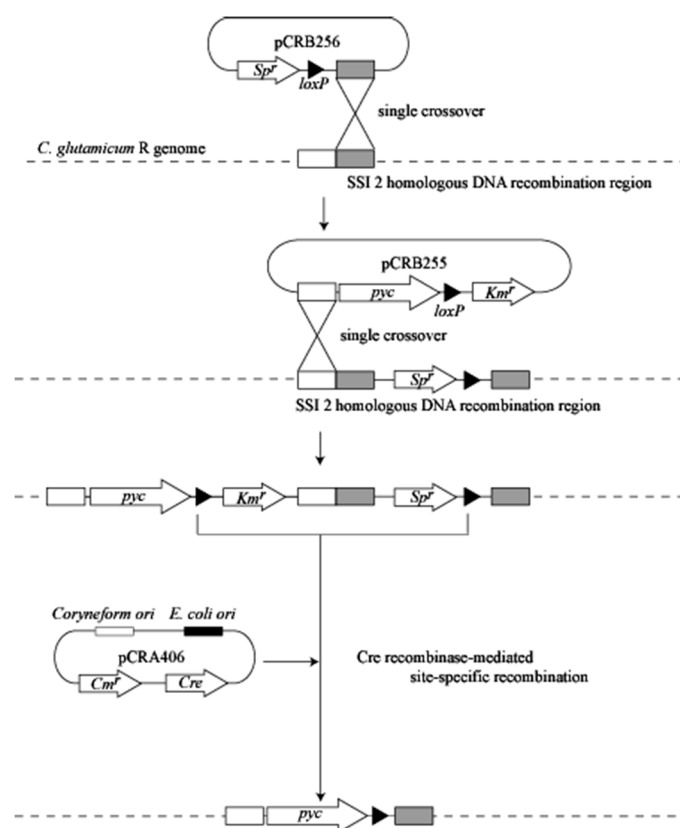

**Figure S1.** Schematic representation of Cre/loxP mediated gene transfer system of the *C. glutamicum* R genome. *Sp<sup>r</sup>*, *Km<sup>r</sup>* and *Cm<sup>r</sup>* indicate spectinomycin, kanamycin and chloramphenicol resistance genes, respectively.

### Construction of *C. glutamicum* CRZ20 and CRZ21 Strains

The multiple-gene transfer system was employed (Figure S2) [4]. With this technique a series of pCRB243-based plasmids (pCRB244 to pCRB252 in Table S1) bearing a short segment of SSI were used to insert the *pyc* gene into SSI region of the chromosome. To construct pCRB243 (Figure S2), A DNA fragment containing the *pyc* gene and the native promoter was excised from pCRA717 [5] with *Xba*I and *Sph*I and was subsequently inserted into the same restriction site of the *E. coli* vector pHSG298 (Takara Bio, Shiga, Japan) that cannot replicate in *C. glutamicum*, yielding pCRB241. The mutant *lox66* site was synthesized with a pair of partly overlapping primers 1 and 2 and the resulting DNA fragment was inserted to the *Xba*I site of pCRB241 to yield pCRB242. To insert the mutant *lox71* site to pCRB242, PCR was performed with two pairs of primers 3–4 and 5–6, and pCRB242 as template. The resultant amplicons were digested with *Xba*I and *Spe*I, and were subsequently ligated each other to yield pCRB243. Each SSI sequence was inserted in the *Sph*I site of pCRB243.

The CRZ20 strain bearing additional 4 copies of *pyc* was constructed by using plasmids pCRB244, 245, 246, and 247 to integrate the *pyc* gene to the genome of the CRZ1 strain. Mutant cells with corresponding antibiotic resistance were selected and chromosomal modification was verified by PCR. The selected mutant strain was transformed with plasmid pCRA406 to delete the region between *lox66* and *lox71* sites by Cre recombinase. For construction of CRZ21 harboring additional 9 copies of *pyc*, pCRB248 to 252 were used in addition to the plasmids used to construct CRZ20.

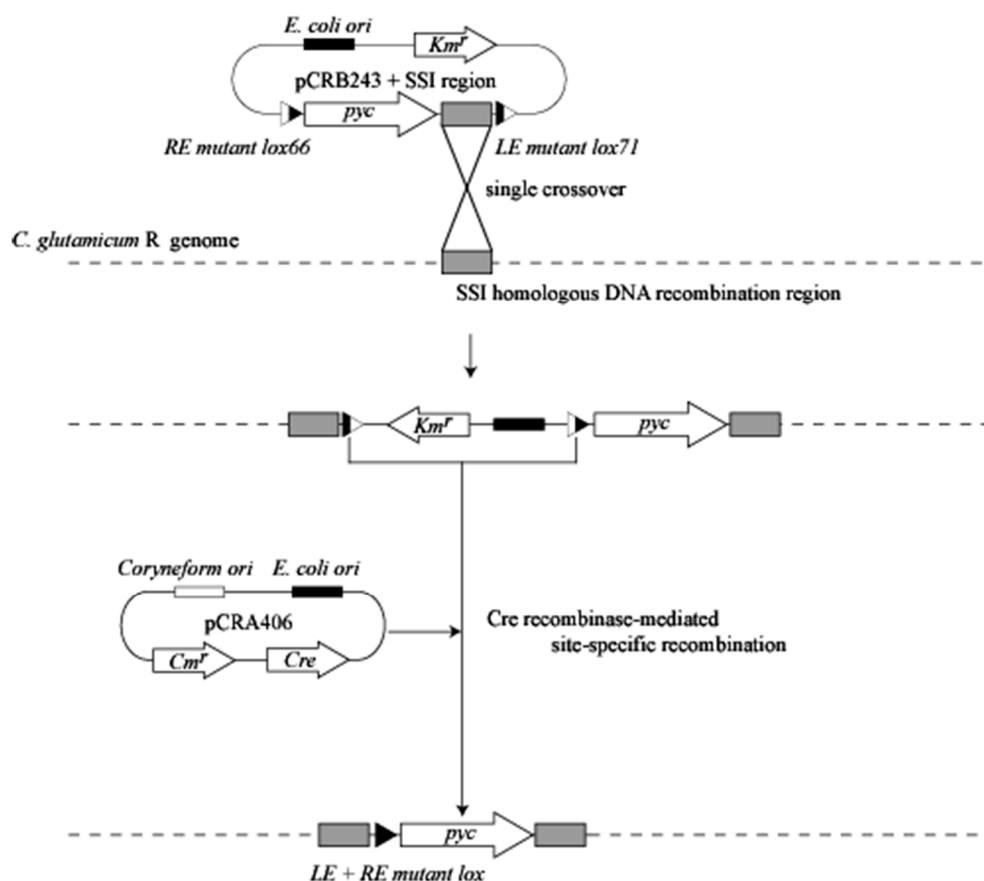

**Figure S2.** Schematic representation of multiple-gene transfer system of the *C. glutamicum* R genome using a mutant lox sequence. *Km<sup>r</sup>* and *Cm<sup>r</sup>* indicate kanamycin and chloramphenicol resistance genes, respectively.

**Table S1.** Oligonucleotide used in this study.

| Primer    | Target Gene     | Sequence (5'-3')                                                | Restriction Site(s) |
|-----------|-----------------|-----------------------------------------------------------------|---------------------|
| Primer 1  | lox66           | CTAGTATAACTTCGTATAGCATACATTATACGAACGGTAA                        |                     |
| Primer 2  | lox66           | CTAGTTACCGTTCGTATAATGTATGCTATACGAAGTTATA                        |                     |
| Primer 3  | lox71 (pCRB242) | ATTCTAGACGGTACCCGGGGATCCTCTA                                    | XbaI                |
| Primer 4  | lox71 (pCRB242) | ATGCATGCAGGAATCGTGTGCA                                          | SphI                |
| Primer 5  | lox71 (pCRB242) | ATGCATGCTACCGTTCGTATAGCATACATTATACGAAGTTATCCAACCTAATCGCCTTGCGAG | SphI                |
| Primer 6  | lox71 (pCRB242) | ATTCTAGAAGCTCGAATTCGTAATCATG                                    | XbaI                |
| Primer 7  | SSI1 region     | ATGCATGCTTAGAGCATTTCTGCGTAGA                                    | SphI                |
| Primer 8  | SSI1 region     | ATGCATGCCGCGGTAGAACTTTTTCTAC                                    | SphI                |
| Primer 9  | SSI2 region     | ATGCATGCGCAGAGCTTCTTCCTCGGTT                                    | SphI                |
| Primer 10 | SSI2 region     | AACGCTCGCGTCTGCTACTT                                            |                     |
| Primer 11 | SSI3 region     | ATGCATGCCACGTGGCGTCGAT                                          | SphI                |
| Primer 12 | SSI3 region     | ATGCATGCGCCGACTTCCTACCGAACTC                                    | SphI                |
| Primer 13 | SSI4 region     | ATGCATGCCGTAGTTGACGACTCGGATT                                    | SphI                |
| Primer 14 | SSI4 region     | TCGATATCTCTGTAAAGGAC                                            |                     |
| Primer 15 | SSI5 region     | ATGCATGCATCTACCGCTGGGTCCAGAA                                    | SphI                |
| Primer 16 | SSI5 region     | ATGCATGCACGCGAAACACTCAGTCACG                                    |                     |
| Primer 17 | SSI6 region     | ATTACGTAGATGCCGATAGCTGCGTAGT                                    | SnaBI               |
| Primer 18 | SSI6 region     | ATTACGTACTTCCTTAGTCCTTCTCCCA                                    | SnaBI               |
| Primer 19 | SSI8 region     | ATGCATGCCTTAGTACTCCACCGAGGTA                                    | SphI                |
| Primer 20 | SSI8 region     | CGACTTAGGAGGTGTGGAAT                                            |                     |
| Primer 21 | SSI9 region     | ATGCATGCGTCCGTGTAGTTGAACCCGA                                    | SphI                |
| Primer 22 | SSI9 region     | ATGCATGCCCAGCATCGTTTTCTGGAGC                                    | SphI                |
| Primer 23 | SSI11 region    | ATGCATGCGTCACCACAATGGCCTCCAA                                    | SphI                |
| Primer 24 | SSI11 region    | ATGCATGCCATGACTAGCCACCAAGTTC                                    | SphI                |

**Table S2.** Plasmids used for construction of markerless mutant.

| Plasmid | Relevant Characteristics                                                                                                   | Source or Reference |
|---------|----------------------------------------------------------------------------------------------------------------------------|---------------------|
| pHSG298 | Km <sup>r</sup> ; $\alpha$ -lac multicloning site, M13 ori                                                                 | TAKARA BIO          |
| pCRA406 | Cm <sup>r</sup> ; Cre expression vector for <i>C. glutamicum</i>                                                           | [3]                 |
| pCRB241 | Km <sup>r</sup> ; pHSG298 with a 3.8-kb XbaI-SphI fragment containing P <sub>native</sub> - <i>pyc</i> gene                | This work           |
| pCRB242 | Km <sup>r</sup> ; a 34-bp SpeI fragment containing lox66 inserted into pCRB241 XbaI site                                   | This work           |
| pCRB243 | Km <sup>r</sup> ; a 34-bp fragment containing lox71 inserted into pCRB242                                                  | This work           |
| pCRB244 | Km <sup>r</sup> ; pCRB243 with a 2.7-kb SphI PCR fragment containing the SSI1 region                                       | This work           |
| pCRB245 | Km <sup>r</sup> ; pCRB243 with a 1.0-kb SphI PCR fragment containing the SSI2 region                                       | This work           |
| pCRB246 | Km <sup>r</sup> ; pCRB243 with a 2.0-kb SphI PCR fragment containing the SSI3 region                                       | This work           |
| pCRB247 | Km <sup>r</sup> ; pCRB243 with a 2.1-kb SphI PCR fragment containing the SSI4 region                                       | This work           |
| pCRB248 | Km <sup>r</sup> ; pCRB243 with a 2.0-kb SphI PCR fragment containing the SSI5 region                                       | This work           |
| pCRB249 | Km <sup>r</sup> ; a 2.0-kb SnaBI PCR fragment containing the SSI6 region inserted into pCRB243 blunt end-treated SphI site | This work           |
| pCRB250 | Km <sup>r</sup> ; pCRB243 with a 2.2-kb SphI PCR fragment containing the SSI8 region                                       | This work           |
| pCRB251 | Km <sup>r</sup> ; pCRB243 with a 2.1-kb SphI PCR fragment containing the SSI9 region                                       | This work           |
| pCRB252 | Km <sup>r</sup> ; pCRB243 with a 2.0-kb SphI PCR fragment containing the SSI11 region                                      | This work           |
| pCRB253 | Km <sup>r</sup> ; a 34-bp fragment containing loxP inserted into pHSG298 PstI-SphI site                                    | This work           |
| pCRB254 | Km <sup>r</sup> ; pCRB253 with a 1.0-kb KpnI-BamHI PCR fragment containing the SSI2 region                                 | This work           |
| pCRB255 | Km <sup>r</sup> ; pCRB254 with a 3.8-kb XbaI-SphI fragment containing P <sub>native</sub> - <i>pyc</i> gene                | This work           |
| pCRB256 | Sp <sup>r</sup> ; pCRA411 with a 1.0-kb XhoI-SphI fragment containing the SSI2 region                                      | This work           |

## References

1. Suzuki, N.; Okayama, S.; Nonaka, H.; Tsuge, Y.; Inui, M.; Yukawa, H. Large-scale engineering of the *Corynebacterium glutamicum* genome. *Appl. Environ. Microbiol.* **2005**, *71*, 3369–3372.
2. Vertès, A.A.; Inui, M.; Kobayashi, M.; Kurusu, Y.; Yukawa, H. Presence of mrr- and mcr-like restriction systems in coryneform bacteria. *Res. Microbiol.* **1993**, *144*, 181–185.
3. Suzuki, N.; Tsuge, Y.; Inui, M.; Yukawa, H. Cre/loxP-mediated deletion system for large genome rearrangements in *Corynebacterium glutamicum*. *Appl. Microbiol. Biotechnol.* **2005**, *67*, 225–233.
4. Suzuki, N.; Nonaka, H.; Tsuge, Y.; Inui, M.; Yukawa, H. New multiple-deletion method for the *Corynebacterium glutamicum* genome, using a mutant lox sequence. *Appl. Environ. Microbiol.* **2005**, *71*, 8472–8480.
5. Inui, M.; Murakami, S.; Okino, S.; Kawaguchi, H.; Vertès, A.A.; Yukawa, H. Metabolic analysis of *Corynebacterium glutamicum* during lactate and succinate productions under oxygen deprivation conditions. *J. Mol. Microbiol. Biotechnol.* **2004**, *7*, 182–196.

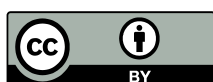

© 2016 by the authors; licensee MDPI, Basel, Switzerland. This article is an open access article distributed under the terms and conditions of the Creative Commons by Attribution (CC-BY) license (<http://creativecommons.org/licenses/by/4.0/>).
